# Runaway evolution from male-male competition

Allen J. Moore<sup>1</sup> | Joel W. McGlothlin<sup>2</sup> | Jason B. Wolf<sup>3</sup>

<sup>1</sup>Department of Entomology, University of Georgia, Athens, Georgia, United States

<sup>2</sup>Department of Biological Sciences, Virginia Tech, Blacksburg, Virginia, United States

<sup>3</sup>Milner Centre for Evolution and Department of Biology and Biochemistry, University of Bath, Bath, United Kingdom

Email: [ajmoore@uga.edu](mailto:ajmoore@uga.edu), [joelmcg@vt.edu](mailto:joelmcg@vt.edu), [j.b.wolf@bath.ac.uk](mailto:j.b.wolf@bath.ac.uk)

Correspondence may be addressed to any author.

## 1 Abstract

2 Strikingly elaborate weapons and displays are widespread features of male contests for mates  
3 across the animal kingdom. Male combat is familiar to students of behavior, and yet while we  
4 understand how female mate choice results in a runaway process, how such evolutionary  
5 extremes arise from male-male competition is unclear. In a quantitative genetic model of  
6 sexual selection for a male signaling trait that mediates aggression in male-male contests, we  
7 show that an honest indicator of aggression can generate selection on itself by altering the  
8 social environment. This can cause selection to accelerate as the trait is elaborated, which can  
9 ultimately lead to runaway evolution. Thus, the key unifying feature of runaway sexual  
10 selection driven by either male-male competition or female mate choice is an evolving source  
11 of selection provided by the social environment. Our model identifies simple conditions  
12 generating runaway evolution and provides clear, testable predictions for empirical studies.

## 13 INTRODUCTION

14 Darwin's (1859, 1871) theory of sexual selection suggested that exaggerated, spectacular, and  
15 bizarre structures and behaviors found in males of many species evolve either because they  
16 enhance success in contests between males for access to females or because they are preferred  
17 by females when choosing mates. The suggestion that male-male competition is common was  
18 relatively uncontroversial; as Darwin (1871) wrote, "It is certain that amongst almost all  
19 animals there is a struggle between the males for the possession of the female. This fact is so  
20 notorious that it would be superfluous to give examples." In contrast, the ability of females to  
21 influence evolution through choice of partners was almost immediately questioned and  
22 continued to be controversial for decades after Darwin (Wallace 1889; Huxley 1938) .  
23 However, theoretical models of evolution via female choice (Lande 1981; Kirkpatrick 1982;  
24 Mead & Arnold 2004) and empirical research documenting female preference in nature  
25 (Andersson 1982, 1994; Rosenthal 2017) eventually led to mate choice becoming the  
26 dominant paradigm in studies of sexual selection. The development of formal mathematical  
27 models showing that male traits and female preferences can coevolve in self-reinforcing  
28 fashion, an idea first proposed by Fisher (1915, 1930), was particularly crucial to the  
29 acceptance of mate choice as an important evolutionary mechanism. The key component of  
30 the Fisher process is that female preference and a preferred male trait become genetically  
31 correlated. This can cause sexually selected male traits to evolve at ever-increasing speed, a  
32 pattern that has been referred to as an evolutionary "runaway" (Fisher 1930; Lande 1981;  
33 Bailey & Moore 2012) because the social environment evolves with the male trait influencing  
34 the social outcome.

35 Despite the current bias towards studies focused on mate choice, Darwin was not  
36 wrong about male-male competition. Members of entire taxa are characterized by highly  
37 modified sexually dimorphic structures that function only in male contests (e.g., Dermaptera,

38 Briceño & Eberhard 1995). Weapons can evolve to be massive and create real functional  
39 constraints for the males that bear them, and such bizarrely elaborate and diverse structures  
40 associated with duels are indeed found across the animal kingdom (Emlen 2008, 2014;  
41 McCullough *et al.* 2016; O'Brien *et al.* 2018). In fact, male-male competition remains a more  
42 common source of selection shaping male traits that influence mating success, and traits  
43 expressed in male-male interactions can be as elaborate as those that are the target of female  
44 preferences (Darwin 1871; Huxley 1938; Andersson 1994; Moore & Moore 2006; Emlen  
45 2008, 2014; McCullough *et al.* 2016; O'Brien *et al.* 2018). However, we still lack robust  
46 genetic models that may be used to generate testable predictions for the evolution of sexually  
47 selected traits via male-male competition. Notably, the potential for male-male competition to  
48 result in a runaway process that drives extreme trait elaboration remains unresolved.

49         Many elaborate male traits used in male-male contests, such as showy plumage  
50 (Hagelin 2002), color (Seehausen & Schluter 2004), pheromones (Moore *et al.* 1997b), and  
51 structures such as antlers (Wilkinson & Dodson 1997), horns (Emlen *et al.* 2005), forceps  
52 (Briceño & Eberhard 1995), and claws (Sneddon *et al.* 1997) function as signals that may  
53 provide information about some underlying qualities of the individuals, such as the  
54 willingness or ability to fight (Parker 1974; Maynard Smith & Harper 1988; Maynard Smith  
55 & Harper 2003; Emlen 2008, 2014). For example, there is often a positive association  
56 between signals or weapons and other traits such as body size (McCullough *et al.* 2016;  
57 O'Brien *et al.* 2018), making the signal or weapon an honest indicator of potential threat to an  
58 opponent. As such, males are expected to adaptively modulate their behavior in response to  
59 these signaling traits, escalating contests they are more likely to win and withdrawing from  
60 ones they are more likely to lose. Because the effect of signaling traits inherently depends on  
61 social context, such traits serve as both targets and sources of selection, potentially leading to  
62 self-reinforcing and accelerating selection as occurs in the runaway process driven by female

63 preference (Lande 1981; Bailey & Kölliker 2019). However, despite insights from optimality  
64 models (Parker 1974; Maynard Smith & Brown 1986; Maynard Smith & Harper 1988;  
65 Maynard Smith & Harper 2003; Rutte *et al.* 2006), how this fundamental feature of extreme  
66 elaboration—an evolving source of selection—may arise within male-male contests is  
67 unclear.

68         Here, we utilize a framework that explicitly incorporates socially contingent trait  
69 expression and fitness (Moore *et al.* 1997a; Wolf *et al.* 1999; McGlothlin *et al.* 2010) to  
70 model trait evolution arising from male-male competition. We show that when honest signals  
71 are used to modulate the behavior of competitors, male-male competition leads to  
72 evolutionary elaboration of male traits. We identify the necessary and sufficient conditions for  
73 trait elaboration to become a runaway process and outline predictions that can be empirically  
74 tested to evaluate this scenario in natural systems. We show that sexual selection by male-  
75 male competition can have features that are analogous to those of runaway sexual selection by  
76 female choice; just as in female mate choice, the social environment in male-male contests  
77 may generate a self-reinforcing source of selection on the traits that mediate the interaction,  
78 potentially leading to self-sustaining and escalating selection.

## 79 **MODEL**

80 To capture the influence of the social environment in a model of male-male competition, we  
81 assume that individuals adjust their behavior in response to the signaling trait values of their  
82 social partners, an assumption that is supported empirically and theoretically (Parker 1974;  
83 West-Eberhard 1979; Maynard Smith 1982; West-Eberhard 1983, 1984; Moore *et al.* 1997a;  
84 West-Eberhard 2003; O'Brien *et al.* 2018; Tinghitella *et al.* 2018; Rico-Guevara & Hurme  
85 2019; Wiens & Tuschhoff 2020). Because the social context (i.e., the social environment) is

86 constructed from traits of conspecifics, this flexible response to social context provides the  
87 opportunity for indirect genetic effects (Moore *et al.* 1997a), which allow the social  
88 environment itself to evolve (Moore *et al.* 2002; Wolf 2003; Bijma & Wade 2008;  
89 McGlothlin *et al.* 2010). Evolutionary changes in the social environment can lead to  
90 concerted evolution because the social environment can be a source of selection on the traits  
91 that themselves compose the social environment (West-Eberhard 1979; Wolf *et al.* 1999;  
92 Bailey & Kölliker 2019; Araya-Ajoy *et al.* 2020; McGlothlin *et al.* 2021). Such “social  
93 selection” (West-Eberhard 1979, 1983, 1984; Wolf *et al.* 1999; Bijma & Wade 2008;  
94 McGlothlin *et al.* 2010) is expected to arise whenever traits act as both the agents and the  
95 targets of selection.

96         We assume that males use a trait (designated by the subscript  $S$ ) to assess some  
97 underlying potential threat of their opponents in social contests. Such a trait can be a weapon  
98 or display that is used as a signal. Possible examples include traits such as a plumage badges,  
99 exaggerated weapons, or vocal or chemical signals. Elaboration of the signal may consist of  
100 an increase in size or complexity, although for heuristic simplicity, we discuss the evolution  
101 of increased signal size. Males also vary in the underlying quality trait that represents an  
102 index of their fighting ability or some other aspect of their phenotype that determines the  
103 threat they represent to their opponent in a contest. We describe this trait as body size  
104 (designated by the subscript  $B$ ) for simplicity. As such, the signal may be genetically  
105 correlated to body size, providing a degree of signal honesty. Males respond to the assessment  
106 of the signal by modulating their behavior toward their opponent (“aggression,” designated by  
107 the subscript  $A$ ) within the contest because the signal provides information on the quality of  
108 their opponent, and hence provides information on the likelihood that they would win an  
109 escalated contest (see below).

110 We assume that both signal size ( $z_S$ ) and body size ( $z_B$ ) are normally distributed  
111 metric traits influenced by many loci of small effect. Expression of these traits can be  
112 partitioned into heritable additive genetic effects (denoted  $a_S$  and  $a_B$ ) and general non-  
113 heritable (environmental and nonadditive genetic) effects (denoted  $e_S$  and  $e_B$ ). We assume  
114 that neither signal nor body size changes as a result of the social interaction. An individual's  
115 total phenotypic value for each trait is then described by a simple sum of the heritable and  
116 non-heritable components, or

$$117 \quad z_i = a_i + e_i, \quad (1)$$

118 where  $a_i$  is normally distributed with mean  $\bar{a}_i$  and variance  $G_{ii}$  and  $e_i$  is normally distributed  
119 with mean 0 and variance  $E_{ii}$ . We make the standard quantitative genetic assumption that  
120 heritable and non-heritable components are uncorrelated. We assume that signal may be  
121 genetically correlated to body size, providing a degree of signal honesty, which is quantified  
122 by the covariance between signal size and body size ( $G_{SB}$ ).

123 For simplicity, we model the outcome of pairwise duels between males drawn at  
124 random from the population. Our model is easily generalized to include multiple interactions  
125 between males (Appendix). We assume that aggressive behavior ( $z_A$ ) in these male-male  
126 contests is context dependent and influenced by the relative signal size of the competing  
127 males, as suggested by West-Eberhard (1979, 1983, 1984). This assumption is well supported  
128 by optimality models and empirical studies (Huxley 1938; Parker 1974; Riechert 1984;  
129 Sneddon *et al.* 1997; Maynard Smith & Harper 2003; Emlen 2008, 2014). The phenotypic  
130 value of aggression can thus be written as

$$131 \quad z_A = a_A + e_A + \delta_{AS}(z_S - z'_S), \quad (2)$$

132 where  $a_A$  and  $e_A$  represent standard additive genetic and uncorrelated non-heritable  
133 components, respectively,  $z_S$  is the signal of the focal individual,  $z'_S$  is the signal of the focal

134 individual's opponent. Here and elsewhere, terms with primes indicate a value assigned to the  
135 focal individual's opponent. The coefficient  $\delta_{AS}$  measures the influence of the difference in  
136 signal size on the expression of aggressive behavior. Thus,  $\delta_{AS}$  is analogous to the  $\psi$  term in  
137 standard interacting phenotype models (Moore *et al.* 1997a), but differs because it depends  
138 upon the value of an interactant's phenotype relative to the focal individual. Because signal  
139 size is heritable, the third term in Eq. 2 includes both a modification of the direct genetic  
140 effect ( $\delta_{AS}a_S$ ) and an indirect genetic effect ( $-\delta_{AS}a'_S$ ), which is defined as the effect of a  
141 social interactant's genes on the expression of a focal individual's phenotype (Moore *et al.*  
142 1997a). We describe the relationship between this model and the standard model of indirect  
143 genetic effects in the Appendix.

144         Because it is conditional and adjusted depending on the social context, the underlying  
145 additive genetic value of aggression is assumed to be uncorrelated to both signal size and  
146 body size ( $G_{SA} = G_{BA} = 0$ ). However, the conditional expression of aggression leads males  
147 with larger signals and/or larger body size to be more aggressive on average (and vice versa).  
148 This can be viewed as the individual with the larger signal being more willing to escalate an  
149 encounter, while the individual with the smaller signal tends to retreat from the interaction.

## 150 **Selection imposed by male-male competition**

151 In social interactions, associations between traits and fitness may cause selection via two  
152 pathways, nonsocial selection (quantified by the gradient  $\beta_N$ ), which arises from effects of a  
153 focal individual's traits on its own fitness, and social selection (quantified by the gradient  $\beta_S$ ),  
154 which arises from the effects of an opponent's traits on the fitness of a focal individual (Wolf  
155 *et al.* 1999). When both are present, individual relative fitness can be written as

$$156 \quad w = w_0 + \mathbf{z}^T \boldsymbol{\beta}_N + \mathbf{z}'^T \boldsymbol{\beta}_S + \varepsilon, \quad (3)$$

157 where  $w_0$  is an intercept,  $\mathbf{z}$  and  $\mathbf{z}'$  are column vectors of focal and opponent traits,  $\boldsymbol{\beta}_N$  and  $\boldsymbol{\beta}_S$   
158 are vectors of nonsocial and social selection gradients,  $\varepsilon$  is an uncorrelated error term, and the  
159 superscript T denotes transposition (Wolf *et al.* 1999). Expressing relative fitness using Eq. 3  
160 has two distinct advantages. First, selection gradients can be estimated in natural populations  
161 using multiple regression (Lande & Arnold 1983; Wolf *et al.* 1999; Formica *et al.* 2011;  
162 Fisher & Pruitt 2019), allowing our model to generate testable predictions. Second, selection  
163 gradients can be combined with genetic parameters to predict short-term evolutionary  
164 response to selection (Lande & Arnold 1983; Bijma & Wade 2008; McGlothlin *et al.* 2010).

165 While Eq. 3 provides a general framework for capturing sources of selection, to  
166 understand the origin and properties (i.e., the magnitude and direction) of these selection  
167 gradients, we can use evolutionary game theory to write a mechanistic expression for relative  
168 fitness based on the costs and benefits arising from male-male contests with signaling,

$$169 \quad w = w_0 + b_A(z_A - z'_A) - c_A z_A z'_A - c_B z'_A z'_B - c_S(\bar{z}_S - \theta_S)z_S + \varepsilon, \quad (4)$$

170 where terms including  $b$  represent fitness benefits and terms including  $c$  represent fitness  
171 costs. In Eq. 4, the benefit term and the first cost term derive from the hawk-dove model of  
172 evolutionary game theory (Maynard Smith & Price 1973; Maynard Smith 1982; McGlothlin  
173 *et al.* 2021). The coefficient  $b_A$  is the fitness benefit of winning a contest, which we assume  
174 derives from greater access to females. In a contest, access to females is determined by a focal  
175 individual's aggression relative to its opponent. Multiplying  $b_A$  by  $(z_A - z'_A)$  reflects the fact  
176 that the probability of winning a contest increases as a male becomes increasingly more  
177 aggressive than its opponent. The term  $c_A z_A z'_A$  is the fitness cost of aggression associated with  
178 escalation of encounters. Logically, an individual pays a cost for acting aggressive that  
179 depends on the level of aggression shown by its opponent. A second fitness cost ( $c_B z'_A z'_B$ )  
180 reflects the fact that the fitness impact of aggression by an opponent ( $z'_A$ ) depends on the size



181 of the opponent ( $z'_B$ ). This cost, which we call the threat of the opponent, derives from the fact  
182 that larger males impose a greater risk of harm by being aggressive than do smaller males.  
183 Finally, we assume that a third cost ( $c_S(\bar{z}_S - \theta_S)z_S$ ) arises from natural selection favoring  
184 some optimal trait value ( $\theta_S$ ), which therefore will oppose signal elaboration. Following a  
185 Gaussian model of selection (Lande 1976, 1979), natural selection against elaborate signals  
186 becomes stronger as the population mean of the signal ( $\bar{z}_S$ ) becomes further away from its  
187 naturally selected optimum ( $\theta_S$ ). Although we do not do so here, this term could be replaced  
188 with a multivariate Gaussian term (Lande 1979) to add naturally selected optima for  
189 aggression and body size.

190 Because selection gradients are equivalent to partial regression slopes, we can use  
191 partial derivatives of Eq. 4 with respect to focal and opponent traits (evaluated at the  
192 population mean) to calculate nonsocial and social selection gradients (McGlothlin *et al.*  
193 2021). Taking these derivatives, we find nonsocial selection gradients for each trait to be

$$194 \quad \beta_{N_S} = -c_S(\bar{z}_S - \theta_S) \quad (5a)$$

$$195 \quad \beta_{N_B} = 0 \quad (5b)$$

$$196 \quad \beta_{N_A} = b_A - c_A\bar{z}_A \quad (5c)$$

197 and social selection gradients to be

$$198 \quad \beta_{S_S} = 0 \quad (6a)$$

$$199 \quad \beta_{S_B} = -c_B\bar{z}_A \quad (6b)$$

$$200 \quad \beta_{S_A} = -b_A - c_A\bar{z}_A - c_B\bar{z}_B. \quad (6c)$$

201 In other words, males with large signals are selected against via nonsocial selection but  
202 interacting with such males does not directly impose social selection. Body size is not under  
203 direct nonsocial selection but imposes a fitness cost via social selection that increases with the

204 population mean of aggression. Nonsocial selection favors aggression until the benefits of  
205 aggression are outweighed by the costs, while social selection imposed by opponent  
206 aggression is always negative, representing a net fitness cost. This gradient becomes  
207 increasingly negative as the population mean aggression and body size increase. These  
208 selection gradients suggest that signal size itself experiences no direct sexual selection. If  
209 signal size increases, it must do so as an indirect response to selection on a correlated trait.

## 210 **Evolutionary response to selection**

211 Selection within a generation is translated into an evolutionary response across generations  
212 through the association between the phenotype, upon which selection acts, and the genotype,  
213 which contributes to the inheritance of the traits across generations. In quantitative genetics,  
214 this genotype-phenotype relationship is most often summarized by the additive genetic  
215 variance, which is used to predict evolutionary response to selection across generations  
216 (Lande & Arnold 1983; Arnold 1994). However, for traits expressed in social interactions, we  
217 must also consider social pathways to fitness, which arise from indirect genetic effects and  
218 social selection, when calculating response to selection (Moore *et al.* 1997a; Bijma & Wade  
219 2008; McGlothlin *et al.* 2010). Because the model of phenotypic modification described in  
220 Eq. 2 deviates from the standard model of indirect genetic effects, we develop a general  
221 equation for response to selection in the Appendix (Eq. 20). Using this equation, the response  
222 to selection for the three traits in our model can in general be written as

$$223 \quad \Delta \bar{z}_S = \frac{1}{2} G_{SS} \left( \beta_{N_S} + \delta_{AS} (\beta_{N_A} - \beta_{S_A}) \right) + \frac{1}{2} G_{SB} \beta_{N_B} \quad (7a)$$

$$224 \quad \Delta \bar{z}_B = \frac{1}{2} G_{BB} \beta_{N_B} + \frac{1}{2} G_{SB} \left( \beta_{N_S} + \delta_{AS} (\beta_{N_A} - \beta_{S_A}) \right) \quad (7b)$$

$$225 \quad \Delta \bar{z}_A = \frac{1}{2} G_{AA} \beta_{N_A}. \quad (7c)$$

226 The multiplier  $\frac{1}{2}$  in Eq. 7 arises because selection is acting only on males. Eq. 7a shows that  
227 modification of aggressive behavior in response to the signaling trait ( $\delta_{AS}$ ) causes both  
228 nonsocial and social selection gradients for aggression to contribute to signal evolution. This  
229 behavioral modification thus effectively causes both a direct genetic correlation between  
230 signaling and aggression and a nonrandom association between the genetic effect on  
231 aggression in the focal individual and the genetic effect on the signal in its opponent. This  
232 behavioral modification also contributes to evolution of body size when the signal is honest  
233 ( $G_{SB} > 0$ ; Eq. 7b). In contrast, behavioral modification does not contribute to evolution of  
234 aggression (Eq. 7c).

235 By substituting Eqs. 5-6 into Eq. 7, we can predict evolutionary change using our  
236 mechanistic fitness model (Eq. 4):

$$237 \quad \Delta \bar{z}_S = \frac{1}{2} G_{SS} (\delta_{AS} (2b_A + c_B \bar{z}_B) - c_S (\bar{z}_S - \theta_S)) \quad (8a)$$

$$238 \quad \Delta \bar{z}_B = \frac{1}{2} G_{SB} (\delta_{AS} (2b_A + c_B \bar{z}_B) - c_S (\bar{z}_S - \theta_S)) \quad (8b)$$

$$239 \quad \Delta \bar{z}_A = \frac{1}{2} G_{AA} (b_A - c_A \bar{z}_A). \quad (8c)$$

240 Eq. 8a shows that when fitness is defined as in Eq. 4, evolution of the signaling trait beyond  
241 its naturally selected optimum depends crucially on behavioral modification. If males do not  
242 change their behavior in response to the signal (i.e., if  $\delta_{AS} = 0$ ), the population mean of the  
243 signaling trait cannot increase. From Eq. 8b, the evolution of body size depends on both  $\delta_{AS}$   
244 and the presence of signal honesty (i.e., genetic covariance between signal and body size,  
245  $G_{SB}$ ). Eqs. 8a-b also show that evolution of the signaling trait and of male body size is  
246 potentially open-ended because the evolutionary response to selection for each trait becomes  
247 stronger as the population mean body size increases. In contrast, from Eq. 8c, the evolution of  
248 aggression is self-limiting because selection depends on the balance of the benefits and costs  
249 of aggression, the latter of which become more intense as mean aggression intensifies. This

250 observation suggests that both signal size and body size may experience runaway evolution if  
251 the benefits of aggression and the threat of the opponent are strong enough to outweigh  
252 natural selection against elaborate signals, whereas aggression should always tend to quickly  
253 evolve to an equilibrium value.

254 To solve for equilibrium and to explore the conditions for such a runaway, we set Eqs.  
255 8a-c equal to zero and solve for the equilibrium mean of each trait ( $\hat{z}_i$ ), yielding

$$256 \quad \hat{z}_S = \theta_S + \delta_{AS} 2b_A + \delta_{AS} \frac{c_B}{c_S} \hat{z}_B \quad (9a)$$

$$257 \quad \hat{z}_B = \frac{c_S}{\delta_{AS} c_B} (\hat{z}_S - \theta_S) - \frac{2b_A}{c_B} \quad (9b)$$

$$258 \quad \hat{z}_A = \frac{b_A}{c_A}. \quad (9c)$$

259 As predicted, aggression will always reach a stable equilibrium whenever there is a cost of  
260 aggression (Eq. 9c, Fig. 1). Eqs. 9a-b predicts a line of equilibria for signal size and body size,  
261 because their evolutionary change is completely intertwined with the relationship  $\Delta \bar{z}_B =$   
262  $\frac{G_{SB}}{G_{SS}} \Delta \bar{z}_S$  (Fig. 1). The slope of the line of equilibria predicting mean signal size from mean  
263 body size, and hence the evolutionary allometry of signal size, is  $\delta_{AS} \frac{c_B}{c_S}$ . This relationship  
264 indicates that when comparing population means through time or across space, positive  
265 allometry (i.e., a slope greater than unity) is predicted when the strength of behavioral  
266 modification multiplied by the threat of the opponent ( $\delta_{AS} c_B$ ) is greater than the strength of  
267 natural selection on signal size ( $c_S$ ). In general, when male behavior is more strongly  
268 dependent on the signal of their opponent (i.e., when  $\delta_{AS}$  is larger), more elaborate signals are  
269 expected at equilibrium (Fig. 2).

270 Whether an evolving population will reach a predicted equilibrium or overshoot it also  
271 depends crucially on the rate of evolution of body size versus natural selection on signal size.  
272 Specifically, from Eq. 8a, in order for runaway evolution to occur, body size must evolve fast

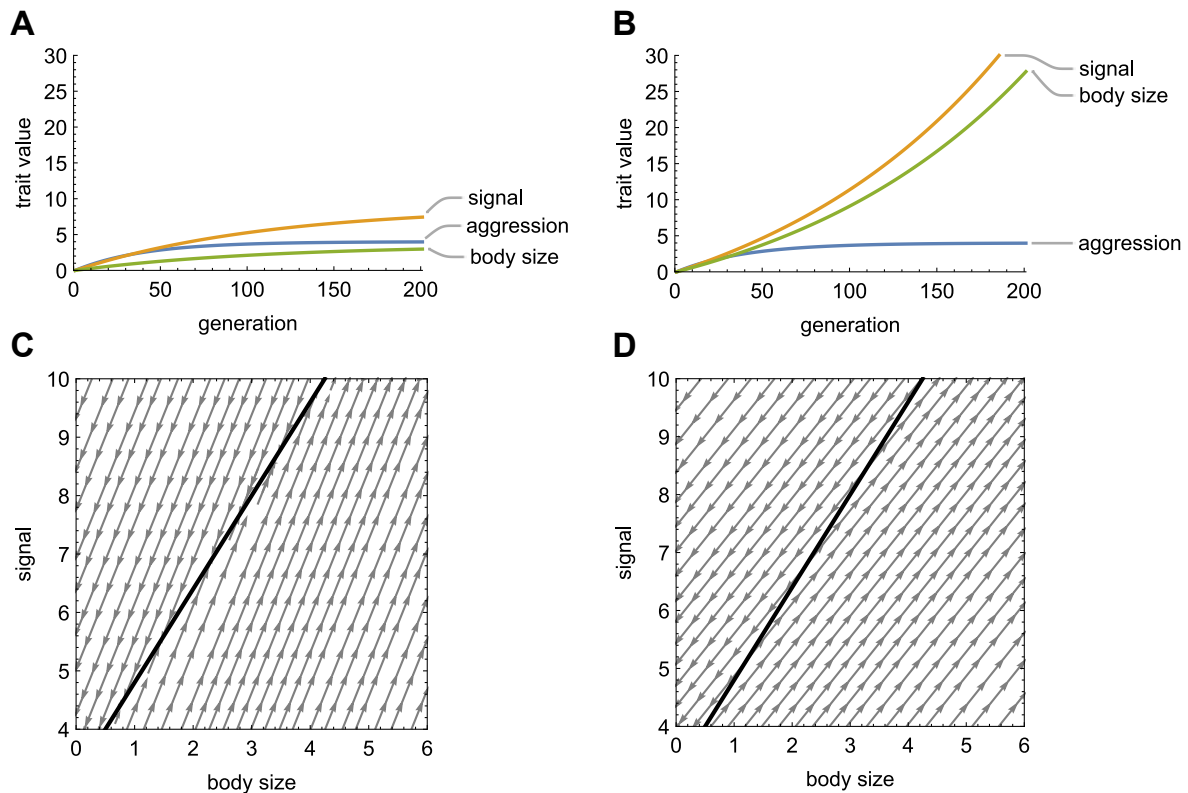

**FIGURE 1** Evolution of a male signal, body size, and aggression in response to male-male competition. Panels A and B show evolutionary trajectories for each trait over 200 generations, and panels C and D show predicted lines of equilibria (heavy line) and their stability (gray arrows). In all panels, all three traits have the same genetic variance ( $G = 1$ ), benefit ( $b_A = 0.2$ ) and cost of aggression ( $c_A = 0.05$ ), fitness cost deriving from the threat of a male's opponent ( $c_B = 0.2$ ), cost of signal size ( $c_S = 0.05$ ; with naturally selected optimum  $\theta_S = 0$ ), and a responsiveness of aggression to body size ( $\delta_{AS} = 0.4$ ). The line of equilibria is calculated from Eq. 9a using these values. In panels A and C, signal size is weakly correlated with body size ( $G_{SB} = 0.4$ ), while in panels B and D, the two traits are more strongly correlated ( $G_{SB} = 0.8$ ). When the genetic correlation between signal size and body size is weak, all three traits reach equilibria (A), with equilibrium aggression predicted solely by costs and benefits. Signal size and body size reach a point on the predicted line of equilibrium (C) that differs depending on their starting values. When the genetic correlation is strong, aggression still reaches an equilibrium, but signal size and body size run away together (B), overshooting the predicted line of equilibria (D). As in Fisherian selection from female mate choice (Lande 1981), male-male competition can drive traits to runaway elaboration or extinction when the line of equilibria is unstable (D).

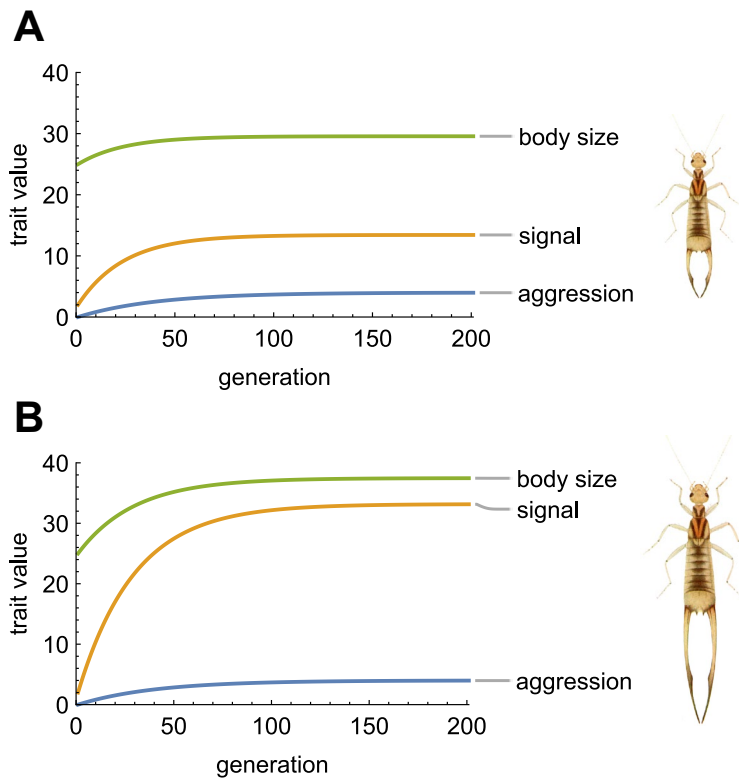

**FIGURE 2** Stronger dependence of male aggressive behavior leads to more elaborate traits at equilibrium. Panel A illustrates a relatively weak influence of opponent signal on male aggression ( $\delta_{AS} = 0.4$ ), while panel B illustrates a stronger influence ( $\delta_{AS} = 0.8$ ). In each panel, we use starting values for traits relevant to the highly sexually dimorphic earwig *Labidura riparia*, which uses its forceps as a signaling trait and is shown to the right of each panel (drawing modified from Lucas 1920). Other parameters are the same as Fig. 1A. When the influence of opponent signal is weak (A), both body size and signal show a moderate evolutionary increase. When the influence is stronger (B), both body size and signal increase more, but the final signal size is much larger relative to body size. The highly elaborate elongate forceps in panel B may be found in other earwig species like *Forcipula gariazzi*.

273 enough that  $\delta_{AS}(2b_A + c_B\bar{z}_B) > c_S(\bar{z}_S - \theta_S)$  regardless of the population mean signal size.

274 Because  $b_A$  and  $\theta_S$  are constants, this occurs when  $\delta_{AS}c_B\Delta\bar{z}_B > c_S\Delta\bar{z}_S$ , or equivalently, when

$$275 \frac{G_{SB}}{G_{SS}} \delta_{AS}c_B > c_S. \quad (10)$$

276 This result is also achievable by solving for the condition generating a negative eigenvalue of  
277 the Jacobian of  $\Delta\bar{z}$ , which indicates an unstable equilibrium (Lande 1981; Bailey & Kölliker  
278 2019). The condition in Eq.10 indicates that runaway evolution of a signal may occur when it  
279 is honest ( $G_{SB}$  is strong and positive), when it modifies aggressive behavior of social partners  
280 ( $\delta_{AS} > 0$ ), and when aggression imposes a fitness cost that increases when opponents are  
281 larger ( $c_B$ ). Fig. 1 illustrates a scenario in which the predicted outcome (equilibrium or  
282 runaway) depends upon the value of the degree of signal honesty (i.e., the genetic covariance  
283  $G_{SB}$ ).

## 284 **DISCUSSION**

285 Our model provides explicit conditions for sexual selection arising from male-male  
286 competition to result in elaborate signals and runaway evolution. We model the origin of costs  
287 and benefits associated with male traits mediating male-male interactions using  
288 considerations from evolutionary game theory, which allows us to derive expressions for  
289 natural and social selection gradients that reflect the mechanistic properties of male contests.  
290 We then incorporate these expressions for selection into a model of trait genetics based on the  
291 interacting phenotypes framework, which accounts for the influence of indirect genetic effects  
292 arising from interactions with an opponent. Elaboration of a signal occurs whenever males  
293 adjust their level of aggression based on the signal of an opponent, and runaway evolution  
294 occurs when the genetic correlation between signal size and body size is large (i.e., the signal  
295 is honest), when aggression in a social partner is modified based on the focal male signal, and

296 when aggression is costly when the opponent is larger (Eq. 10; Fig. 1, 2). In contrast,  
297 aggression always reaches an equilibrium, both because the fitness benefit of aggression is  
298 relative to that of the opponent and because of the fitness costs of escalated contests. Limits to  
299 runaway evolution of the signaling trait depend on the strength of natural selection opposing  
300 signal elaboration, which may arise through costs of producing or bearing the signal.

301 Our model provides predictions that are testable in natural populations. Specifically,  
302 we expect the evolution of elaborate signaling traits that resolve duels between males to  
303 evolve when three conditions are present. First, signals should be reliable predictors of body  
304 size or some other proxy of fighting ability. Indeed, such signal honesty, which is often  
305 characterized as positive allometry (McCullough *et al.* 2016; O'Brien *et al.* 2018) or a  
306 positive genetic correlation (Clark & Moore 1995; McGlothlin *et al.* 2005; Laidre &  
307 Johnstone 2013) between size and signal, is a common feature of traits involved in male-male  
308 competition. Second, males must modify their behavior in response to their opponent's  
309 signal. We assume that males increase their aggression when encountering an opponent with a  
310 smaller signal than their own and reduce their aggression when encountering an opponent  
311 with a larger signal. Such adjustment is common in species that resolve contests via limited  
312 fights or displays (Darwin 1871; West-Eberhard 1979, 1983; Emlen 2008, 2014). In our  
313 model, this phenomenon alters the relationship between genotype and phenotype, causing a  
314 net force of social selection to contribute to signal evolution (Eqs. 7a, 8a). Finally, we expect  
315 social selection to be imposed via the aggression of opponents. This selection becomes  
316 stronger as male body size or fighting ability evolves due to the threat of escalation of fights  
317 with large opponents. Mean level of aggression need not change if the threat escalates. Our  
318 model makes specific predictions for the signs of these gradients when selection on signal  
319 size, body size, and aggression can all be measured (Eqs. 5-6). Most crucially, our model  
320 predicts negative social selection gradients for both body size and aggression, which reflect



321 the costs of escalated contests. In populations that are experiencing an evolutionary runaway,  
322 these gradients should become stronger as body size and signal size coevolve. Although few  
323 studies have measured social selection gradients, the limited evidence that exists supports the  
324 existence of negative social selection gradients imposed by competitors (Formica *et al.* 2011;  
325 Fisher & Pruitt 2019).

## 326 **Parallels to models of female choice**

327 The results of our model are conceptually analogous to models of runaway sexual selection  
328 via female choice, suggesting some key parallels between the processes. Both our model and  
329 Lande's (1981) model of female choice, which was the first formal model of Fisher's  
330 runaway process, result in lines of equilibria that may be stable or unstable depending on the  
331 genetic parameters. For the scenario of relative mate preference in Lande's model, the line of  
332 equilibria for a male trait ( $\hat{z}$ ) and a female preference ( $\hat{y}$ ) can be written as

$$333 \quad \hat{z} = \theta + \frac{b_{SS}}{c_{NS}} \hat{y} \quad (11)$$

334 where  $\theta$  is the natural selection optimum,  $b_{SS}$  is the strength of sexual selection, and  $c_{NS}$  is the  
335 strength of natural selection. Eq. 11 directly parallels Eq. 9a from our model and emphasizes  
336 that in male-male competition, the force of sexual selection is provided not by direct female  
337 choice but by male body size (or some other measure of willingness or ability to engage in  
338 aggression). In male-male competition, the threat of the opponent ( $c_B$ ) leads to social  
339 selection, which is indirectly translated into evolutionary change in male signals via the  
340 parameter  $\delta_{AS}$ , measuring the dependence of aggression on relative signal size of two  
341 competing males.

342 Similarly, the condition for runaway evolution of male traits and female preference  
343 driven by mate choice in Lande's model can be written as

$$344 \quad \frac{B}{G} b_{SS} > c_{NS}, \quad (12)$$

345 where  $B$  represents the genetic covariance between male trait and female preference and  $G$   
346 represents genetic variance of the male trait (Maynard Smith & Harper 2003). The condition  
347 in Eq. 12 directly parallels the condition in Eq. 10, emphasizing again that in male-male  
348 competition,  $\delta_{AS}c_B$  provides the force of social selection that indirectly leads to an  
349 evolutionary increase in male signal size. Both types of runaway evolution are driven by  
350 genetic covariance. In mate choice, runaway is driven by the covariance between the sexes  
351 that arises from choosy females mating with attractive males, but in male-male competition,  
352 this effect arises directly from signal honesty, i.e., the genetic covariance between a signaling  
353 trait and the threat it signals. Moreover, if the mean level of aggression does not change, in  
354 male-male competition increasing costs are associated only with the increasingly elaborated  
355 signal. This may occur when aggression is not expressed outside of male-male competition  
356 and when limited fights settle contests (Maynard Smith & Harper 1988; Maynard Smith &  
357 Harper 2003). These are common conditions (Parker 1974; West-Eberhard 1983, 1984;  
358 Maynard Smith & Harper 1988; Andersson 1994), suggesting that runaway from male-male  
359 competition may occur frequently (McCullough *et al.* 2016; Rico-Guevara & Hurme 2019).

## 360 **Conclusion**

361 Ritualized displays and elaborated signals associated with the potential for aggression are  
362 readily observed in nature and their importance often obvious and spectacular (Darwin 1871;  
363 Parker 1974; Maynard Smith & Harper 1988; Maynard Smith & Harper 2003; Emlen 2008,  
364 2014). Yet the details of how these might evolve have been unclear. Previous optimality  
365 models have shown that overt aggression can be ameliorated by conventional signals (Parker  
366 1974; Maynard Smith 1982; Maynard Smith & Harper 1988; Maynard Smith & Harper 2003;

367 Rutte *et al.* 2006), and verbal models have proposed that signaling traits associated with  
368 male-male competition evolve exaggerated expression because social selection is intense  
369 (West-Eberhard 1979, 1983, 1984). Male-male competition may well result in intense  
370 selection (Maynard Smith & Brown 1986) as mating can be highly skewed toward one or a  
371 few males in a population (Darwin 1871; Andersson 1994; Shuster & Wade 2003), but this  
372 alone is insufficient to result in exaggerated traits. Our model shows that feedback between  
373 the behavioral and morphological traits mediating male-male competition create runaway  
374 evolution. Thus, the unifying feature of runaway sexual selection by both male-male  
375 competition and female mate choice is an evolving source of selection provided by the social  
376 environment.

## 377 APPENDIX

### 378 General equation for response to selection

379 Here, we develop a general model for evolution when trait expression depends upon the  
380 difference between a focal individual's own traits and traits of another individual encountered  
381 in the context of a social interaction. This model is directly applied to male-male contests in  
382 the main text and may be useful for considering many other types of social interactions. First,  
383 consider a vector of traits ( $\mathbf{z}$ ) whose expression can be decomposed into three components: a  
384 vector of additive genetic effects ( $\mathbf{a}$ ), a vector of environmental effects ( $\mathbf{e}$ ), and a social  
385 response term that depends on the difference between the traits of the focal individual and  
386 those of a social interactant ( $\mathbf{z}'$ ):

$$387 \quad \mathbf{z} = \mathbf{a} + \mathbf{e} + \boldsymbol{\delta}(\mathbf{z} - \mathbf{z}'). \quad (13)$$

388 The matrix  $\boldsymbol{\delta}$  consists of components  $\delta_{ij}$  that translate the effect of differences in trait  $j$  into  
389 expression of trait  $i$ . Similarly, the phenotype of the social partner can be written as

$$390 \quad \mathbf{z} = \mathbf{a}' + \mathbf{e}' + \boldsymbol{\delta}(\mathbf{z}' - \mathbf{z}). \quad (14)$$

391 As we show below, because the term  $\boldsymbol{\delta}(\mathbf{z} - \mathbf{z}')$  in Eqs. 13-14 contains phenotypes of both  
392 individuals, it consists of a combination of direct and indirect genetic effects.

393 To calculate a response to selection for traits expressed as in Eq. 13, we first solve for  
394 the multivariate phenotypic mean. Assuming that environmental effects have a mean of zero,  
395 the trait mean is

$$396 \quad \bar{\mathbf{z}} = \bar{\mathbf{a}} + \boldsymbol{\delta}(\bar{\mathbf{z}} - \bar{\mathbf{z}}) = \bar{\mathbf{a}}, \quad (15)$$

397 which means that the population trait mean will depend only on the mean additive genetic  
398 value. The vector of total breeding values ( $\mathbf{A}$ ), which represents the genetic contribution to the

399 population mean and is used to calculate evolutionary responses to selection, is equivalent to  
 400 the vector of additive genetic effects ( $\mathbf{a}$ ). Next, to derive an explicit definition of the  
 401 phenotype, we first use substitution to write

$$402 \quad \boldsymbol{\delta}(\mathbf{z} - \mathbf{z}') = (\mathbf{I} - 2\boldsymbol{\delta})^{-1}\boldsymbol{\delta}(\mathbf{a} + \mathbf{e} - \mathbf{a}' - \mathbf{e}') \quad (16)$$

403 where  $\mathbf{I}$  is the identity matrix. After some algebra, Eq. 16 allows us to write explicit  
 404 definitions of the two phenotypes as

$$405 \quad \mathbf{z} = (\mathbf{I} - 2\boldsymbol{\delta})^{-1}((\mathbf{I} - \boldsymbol{\delta})(\mathbf{a} + \mathbf{e}) - \boldsymbol{\delta}(\mathbf{a}' + \mathbf{e}')) \quad (17)$$

406 and

$$407 \quad \mathbf{z}' = (\mathbf{I} - 2\boldsymbol{\delta})^{-1}((\mathbf{I} - \boldsymbol{\delta})(\mathbf{a}' + \mathbf{e}') - \boldsymbol{\delta}(\mathbf{a} + \mathbf{e})). \quad (18)$$

408 Response to selection can then be calculated following McGlothlin *et al.* (McGlothlin *et al.*  
 409 2010) as

$$410 \quad \Delta\bar{\mathbf{z}} = \text{Cov}(\mathbf{A}, \mathbf{z}^T)\boldsymbol{\beta}_N + \text{Cov}(\mathbf{A}, \mathbf{z}'^T)\boldsymbol{\beta}_S. \quad (19)$$

411 Substituting Eqs. 17-18 into Eq. 19 and simplifying yields

$$412 \quad \Delta\bar{\mathbf{z}} = \mathbf{G}(\mathbf{I} - (1 + r)\boldsymbol{\delta}^T)(\mathbf{I} - 2\boldsymbol{\delta}^T)^{-1}\boldsymbol{\beta}_N + \mathbf{G}(r\mathbf{I} - (1 + r)\boldsymbol{\delta}^T)(\mathbf{I} - 2\boldsymbol{\delta}^T)^{-1}\boldsymbol{\beta}_S, \quad (20)$$

413 where  $\mathbf{G}$  is the additive genetic (co)variance matrix and  $r$  is relatedness. Eq. 20 can be used to  
 414 generate the specific model in the text by setting parameters as

$$415 \quad \mathbf{G} = \begin{bmatrix} G_{SS} & G_{SB} & 0 \\ G_{SB} & G_{BB} & 0 \\ 0 & 0 & G_{AA} \end{bmatrix}, \boldsymbol{\delta} = \begin{bmatrix} 0 & 0 & 0 \\ 0 & 0 & 0 \\ \delta_{AS} & 0 & 0 \end{bmatrix}, \boldsymbol{\beta}_N = \begin{bmatrix} \beta_{NS} \\ \beta_{NB} \\ \beta_{NA} \end{bmatrix}, \boldsymbol{\beta}_S = \begin{bmatrix} \beta_{SS} \\ \beta_{SB} \\ \beta_{SA} \end{bmatrix}, r = 0 \quad (21)$$

416 and multiplying the result by  $\frac{1}{2}$  to indicate selection acting only on males.

## 417 **Relationship to indirect genetic effects models**

418 The model described above differs from previous models of indirect genetic effects in that  
419 phenotypes may be adjusted in relation to both the phenotypes of a social partner and other  
420 phenotypes of the focal individual. The standard model of phenotypic expression used in trait-  
421 based genetic effects models (Moore *et al.* 1997a) is

$$422 \mathbf{z} = \mathbf{a} + \mathbf{e} + \mathbf{\Psi}\mathbf{z}'. \quad (22)$$

423 The relationship between the two models can be seen by adding an additional term to the  
424 standard model:

$$425 \mathbf{z} = \mathbf{a} + \mathbf{e} + \boldsymbol{\xi}\mathbf{z} + \mathbf{\Psi}\mathbf{z}'. \quad (23)$$

426 The term  $\boldsymbol{\xi}\mathbf{z}$ , which is similar to the developmental interaction effects considered by Wolf *et al.*  
427 *al.* (Wolf *et al.* 2001), contains a conditional modification of the direct genetic effect in  
428 response to other phenotypic traits, while the term  $\mathbf{\Psi}\mathbf{z}'$  contains indirect genetic effects  
429 (Moore *et al.* 1997a). When  $\boldsymbol{\xi} = \mathbf{0}$ , model 23 is equivalent to model 22, and when  $\boldsymbol{\xi} = -\mathbf{\Psi} =$   
430  $\boldsymbol{\delta}$ , model 23 is equivalent to model 13.

431 Incorporating conditional direct genetic effects is a way to mechanistically represent  
432 genetic covariances in a quantitative genetic model (Wolf *et al.* 2001). Combining such  
433 effects with indirect genetic effects allows exploration of a wide variety of models of  
434 phenotypic adjustment, including behavioral modification, in evolutionary quantitative  
435 genetic models. For full generality, we give the equation for multivariate response to selection  
436 derived from model 23. First, the vector of total breeding values derived from the trait mean  
437 is

$$438 \mathbf{A} = (\mathbf{I} - \boldsymbol{\xi} - \mathbf{\Psi})^{-1}\mathbf{a}. \quad (24)$$

439 By substitution of Eqs. 23-24 into Eq. 19, we find

$$\begin{aligned} 440 \quad \Delta \bar{z} &= (\mathbf{I} - \boldsymbol{\xi} - \boldsymbol{\Psi})^{-1} \mathbf{G} (\mathbf{I} + r(\mathbf{I} - \boldsymbol{\xi}^T)^{-1} \boldsymbol{\Psi}^T) (\mathbf{I} - \boldsymbol{\xi}^T - \boldsymbol{\Psi}^T (\mathbf{I} - \boldsymbol{\xi}^T)^{-1} \boldsymbol{\Psi}^T)^{-1} \boldsymbol{\beta}_N + \\ 441 \quad & (\mathbf{I} - \boldsymbol{\xi} - \boldsymbol{\Psi})^{-1} \mathbf{G} (r\mathbf{I} + (\mathbf{I} - \boldsymbol{\xi}^T)^{-1} \boldsymbol{\Psi}^T) (\mathbf{I} - \boldsymbol{\xi}^T - \boldsymbol{\Psi}^T (\mathbf{I} - \boldsymbol{\xi}^T)^{-1} \boldsymbol{\Psi}^T)^{-1} \boldsymbol{\beta}_S. \end{aligned} \quad (25)$$

442 This equation is unwieldy in its multivariate form, but one can follow the approach we take  
 443 here for male-male competition and use Eq. 25 to generate much simpler models of the  
 444 evolution of systems of responsive traits given a set of assumptions about fitness and trait  
 445 expression.

#### 446 **Extension to multiple opponents**

447 Our results can be extended to incorporate interactions with multiple opponents. Suppose a  
 448 male encounters opponents sequentially. The phenotype of a focal individual averaged over  
 449 all encounters is then

$$450 \quad \bar{\mathbf{z}} = (\mathbf{I} - 2\boldsymbol{\delta})^{-1} ((\mathbf{I} - \boldsymbol{\delta})(\mathbf{a} + \mathbf{e}) - \boldsymbol{\delta}(\bar{\mathbf{a}}' + \bar{\mathbf{e}}')), \quad (26)$$

451 and the average of his social partners is

$$452 \quad \bar{\mathbf{z}}' = (\mathbf{I} - 2\boldsymbol{\delta})^{-1} ((\mathbf{I} - \boldsymbol{\delta})(\bar{\mathbf{a}}' + \bar{\mathbf{e}}') - \boldsymbol{\delta}(\mathbf{a} + \mathbf{e})), \quad (27)$$

453 where an overbar is now taken to indicate an average over an individual male's encounters. If  
 454 we assume that the fitness effects of individual encounters accrue additively, then Eq. 20 may  
 455 still be used to predict the evolution of the population mean, with  $\boldsymbol{\beta}_N$  and  $\boldsymbol{\beta}_S$  now representing  
 456 vectors of partial regression slopes of fitness on focal individual mean and social group mean  
 457 phenotypes, respectively. Specific fitness models may be substituted into Eq. 20 in the same  
 458 way as for models of single pairwise interactions.

459 **ACKNOWLEDGMENTS**

460 We thank our collaborators, students, and postdoctoral scientists over the years for  
461 discussions and comments on various earlier versions of the manuscript. This work was  
462 supported by grants from NERC (UK, NE/C510659/1 to JBW) and NSF (USA, IOS-1354358  
463 to AJM, DEB-1457463 to JWM).

464 **AUTHOR CONTRIBUTIONS**

465 AJM, JWM, and JBW conceived the idea, developed the model, and wrote the paper.



466 **REFERENCES**

- 467 Andersson, M. (1982). Female choice selects for extreme tail length in a widowbird. *Nature*,  
468 299, 818-820.
- 469 Andersson, M. (1994). *Sexual Selection*. Princeton Univ. Press, Princeton.
- 470 Araya-Ajoy, Y.G., Westneat, D.F. & Wright, J. (2020). Pathways to social evolution and their  
471 evolutionary feedbacks. *Evolution*, 74, 1894-1907.
- 472 Arnold, S.J. (1994). Multivariate inheritance and evolution: a review of concepts. In:  
473 *Quantitative Genetic Studies of Behavioral Evolution* (ed. Boake, CR). Univ. of  
474 Chicago Press Chicago, pp. 17-48.
- 475 Bailey, N.W. & Kölliker, M. (2019). Social runaway: Fisherian elaboration (or reduction) of  
476 socially selected traits via indirect genetic effects. *Evolution*, 73, 1549-1563.
- 477 Bailey, N.W. & Moore, A.J. (2012). Runaway sexual selection without genetic correlations:  
478 social environments and flexible mate choice initiate and enhance the Fisher process.  
479 *Evolution*, 66, 2674-2684.
- 480 Bijma, P. & Wade, M.J. (2008). The joint effects of kin, multilevel selection and indirect  
481 genetic effects on response to genetic selection. *J. Evol. Biol.*, 21, 1175-1188.
- 482 Briceño, R.D. & Eberhard, W.G. (1995). *The functional morphology of male cerci and*  
483 *associated characters in 13 species of tropical earwigs (Dermaptera: Forficulidae,*  
484 *Labiidae, Carcinophoridae, Pygidicranidae)*. Smithsonian Institution Press,  
485 Washington, DC.
- 486 Clark, D.C. & Moore, A.J. (1995). Genetic aspects of communication during male-male  
487 competition in the Madagascar hissing cockroach: honest signaling of size. *Heredity*,  
488 75, 198-205.
- 489 Darwin, C. (1859). *The Origin of Species*. John Murray, London.
- 490 Darwin, C. (1871). *The Descent of Man, and Selection in Relation to Sex*. John Murray,  
491 London.
- 492 Emlen, D.J. (2008). The Evolution of Animal Weapons. *Annu. Rev. Ecol. Evol. Syst.*, 39, 387-  
493 413.
- 494 Emlen, D.J. (2014). *Animal Weapons: The Evolution of Battle*. Henry Holt & Co., New York.
- 495 Emlen, D.J., Marangelo, J., Ball, B. & Cunningham, C.W. (2005). Diversity in the weapons  
496 of sexual selection: horn evolution in the beetle genus *Onthophagus* (Coleoptera :  
497 Scarabaeidae). *Evolution*, 59, 1060-1084.

- 498 Fisher, D.N. & Pruitt, J.N. (2019). Opposite responses to selection and where to find them. *J.*  
499 *Evol. Biol.*, 32, 505-518.
- 500 Fisher, R.A. (1915). The evolution of sexual preference. *Eugen Rev*, 7, 184-192.
- 501 Fisher, R.A. (1930). *The Genetical Theory of Natural Selection*. Clarendon Press, Oxford.
- 502 Formica, V.A., McGlothlin, J.W., Wood, C.W., Augat, M.E., Butterfield, R.E., Barnard, M.E.  
503 *et al.* (2011). Phenotypic assortment mediates the effect of social selection in a wild  
504 beetle population. *Evolution*, 65, 2771-2781.
- 505 Hagelin, J.C. (2002). The kinds of traits involved in male-male competition: a comparison of  
506 plumage, behavior, and body size in quail. *Behav. Ecol.*, 13, 32-41.
- 507 Huxley, J.S. (1938). Darwin's theory of sexual selection and the data subsumed by it, in the  
508 light of recent research. *Am. Nat.*, 72, 416-433.
- 509 Kirkpatrick, M. (1982). Sexual selection and the evolution of female mate choice. *Evolution*,  
510 36, 1-12.
- 511 Laidre, M.E. & Johnstone, R.A. (2013). Animal signals. *Curr. Biol.*, 23, R829-R833.
- 512 Lande, R. (1976). Natural selection and random genetic drift in phenotypic evolution.  
513 *Evolution*, 30, 314-334.
- 514 Lande, R. (1979). Quantitative genetic analysis of multivariate evolution, applied to  
515 brain:body size allometry. *Evolution*, 33, 402-416.
- 516 Lande, R. (1981). Models of speciation by sexual selection on polygenic traits. *Proc. Natl.*  
517 *Acad. Sci. USA*, 78, 3721-3725.
- 518 Lande, R. & Arnold, S.J. (1983). The measurement of selection on correlated characters.  
519 *Evolution*, 37, 1210-1226.
- 520 Lucas, W.J. (1920). *A Monograph of the British Orthoptera*. The Ray Society, London.
- 521 Maynard Smith, J. (1982). *Evolution and the Theory of Games*. Cambridge Univ. Press,  
522 Cambridge.
- 523 Maynard Smith, J. & Brown, R.L.W. (1986). Competition and body size. *Theor. Popul. Biol.*,  
524 30, 166-179.
- 525 Maynard Smith, J. & Harper, D. (2003). *Animal Signals*. Oxford Univ. Press, Oxford.
- 526 Maynard Smith, J. & Harper, D.G.C. (1988). The evolution of aggression: can selection  
527 generate variability? *Philos. Trans. R. Soc. Lond. B*, 319, 557-570.
- 528 Maynard Smith, J. & Price, G.R. (1973). The logic of animal conflict. *Nature*, 246, 15-18.
- 529 McCullough, E.L., Miller, C.W. & Emlen, D.J. (2016). Why sexually selected weapons are  
530 not ornaments. *Trends Ecol. Evol.*, 31, 742-751.

- 531 McGlothlin, J.W., Akçay, E., Brodie, E.D., III, Moore, A.J. & Van Cleve, J. (2021). A  
532 synthesis of evolutionary game theory and quantitative genetic models of social  
533 evolution. *bioRxiv*, 10.1101/2021.03.27.437341.
- 534 McGlothlin, J.W., Moore, A.J., Wolf, J.B. & Brodie, E.D., III (2010). Interacting phenotypes  
535 and the evolutionary process. III. Social evolution. *Evolution*, 64, 2558-2574.
- 536 McGlothlin, J.W., Parker, P.G., Nolan, V., Jr. & Ketterson, E.D. (2005). Correlational  
537 selection leads to genetic integration of body size and an attractive plumage trait in  
538 dark-eyed juncos. *Evolution*, 59, 658-671.
- 539 Mead, L.S. & Arnold, S.J. (2004). Quantitative genetic models of sexual selection. *Trends*  
540 *Ecol. Evol.*, 19, 264-271.
- 541 Moore, A.J., Brodie, E.D., III & Wolf, J.B. (1997a). Interacting phenotypes and the  
542 evolutionary process: I. Direct and indirect genetic effects of social interactions  
543 *Evolution*, 51, 1352-1362.
- 544 Moore, A.J., Haynes, K.F., Preziosi, R.F. & Moore, P.J. (2002). The evolution of interacting  
545 phenotypes: genetics and evolution of social dominance. *Am. Nat.*, 160, S186-S197.
- 546 Moore, A.J. & Moore, P.J. (2006). The genetics of sexual selection. In: *Evolutionary Genetics*  
547 (eds. Fox, CW & Wolf, JB). Oxford Univ. Press Oxford, pp. 339-349.
- 548 Moore, P.J., Reagan-Wallin, N.L., Haynes, K.F. & Moore, A.J. (1997b). Odour conveys  
549 status on cockroaches. *Nature*, 389, 25-25.
- 550 O'Brien, D.M., Allen, C.E., Van Kleeck, M.J., Hone, D., Knell, R., Knapp, A. *et al.* (2018).  
551 On the evolution of extreme structures: static scaling and the function of sexually  
552 selected signals. *Anim. Behav.*, 144, 95-108.
- 553 Parker, G.A. (1974). Assessment strategy and the evolution of fighting behaviour. *J. Theor.*  
554 *Biol.*, 47, 223-243.
- 555 Rico-Guevara, A. & Hurme, K.J. (2019). Intrsexually selected weapons. *Biol. Rev.*, 94, 60-  
556 101.
- 557 Riechert, S.E. (1984). Games spiders play. III. Cues underlying context-associated changes in  
558 agonistic behavior. *Anim. Behav.*, 32, 1-15.
- 559 Rosenthal, G.G. (2017). *Mate Choice: The Evolution of Sexual Decision Making from*  
560 *Microbes to Humans*. Princeton Univ. Press, Princeton.
- 561 Rutte, C., Taborsky, M. & Brinkhof, M.W.G. (2006). What sets the odds of winning and  
562 losing? *Trends Ecol. Evol.*, 21, 16-21.

- 563 Seehausen, O. & Schluter, D. (2004). Male-male competition and nuptial-colour displacement  
564 as a diversifying force in Lake Victoria cichlid fishes. *Proc. R. Soc. Lond. B*, 271,  
565 1345-1353.
- 566 Shuster, S.M. & Wade, M.J. (2003). *Mating Systems and Strategies*. Princeton Univ. Press,  
567 Princeton.
- 568 Sneddon, L.U., Huntingford, F.A. & Taylor, A.C. (1997). Weapon size versus body size as a  
569 predictor of winning in fights between shore crabs, *Carcinus maenas* (L.). *Behav.*  
570 *Ecol. Sociobiol.*, 41, 237-242.
- 571 Tinghitella, R.M., Lackey, A.C.R., Martin, M., Dijkstra, P.D., Drury, J.P., Heathcote, R. *et al.*  
572 (2018). On the role of male competition in speciation: a review and research agenda.  
573 *Behav. Ecol.*, 29, 783-797.
- 574 Wallace, A.R. (1889). *Darwinism: An Exposition of the Theory of Natural Selection, with*  
575 *Some of its Applications*. Macmillan, London.
- 576 West-Eberhard, M.J. (1979). Sexual selection, social competition, and evolution. *Proc. Am.*  
577 *Phil. Soc.*, 123, 222-234.
- 578 West-Eberhard, M.J. (1983). Sexual selection, social competition, and speciation. *Q. Rev.*  
579 *Biol.*, 58, 155-183.
- 580 West-Eberhard, M.J. (1984). Sexual selection, competitive communication and species-  
581 specific signals. In: *Insect Communication* (ed. Lewis, T). Academic Press New York,  
582 pp. 283-324.
- 583 West-Eberhard, M.J. (2003). *Developmental Plasticity and Evolution*. Oxford Univ. Press,  
584 Oxford.
- 585 Wiens, J.J. & Tuschhoff, E. (2020). Songs versus colours versus horns: what explains the  
586 diversity of sexually selected traits? *Biol. Rev.*, 95, 847-864.
- 587 Wilkinson, G.S. & Dodson, G.N. (1997). Function and evolution of antlers and eye stalks in  
588 flies. In: *The Evolution of Mating Systems in Insects and Arachnids* (eds. Choe, JC &  
589 Crespi, BJ). Cambridge Univ. Press Cambridge.
- 590 Wolf, J.B. (2003). Genetic architecture and evolutionary constraint when the environment  
591 contains genes. *Proc. Natl. Acad. Sci. USA*, 100, 4655-4660.
- 592 Wolf, J.B., Brodie, E.D., III & Moore, A.J. (1999). Interacting phenotypes and the  
593 evolutionary process. II. Selection resulting from social interactions. *Am. Nat.*, 153,  
594 254-266.

595 Wolf, J.B., Frankino, W.A., Agrawal, A.F., Brodie, E.D., III & Moore, A.J. (2001).  
596 Developmental interactions and the constituents of quantitative variation. *Evolution*,  
597 55, 232-245.
